# Supplementary material for: Heterostructured ZnCdS@ZIF-67 as a Photocatalyst for Fluorescent Dye Degradation and Selectively Nonenzymatic Sensing of Dopamine
Source: MDPI journal article supplement (doi:10.3390/ma15217683), 2022-11-01
Supplement: s1 [file s1]

# Supporting Information

**Heterostructured ZnCdS@ZIF-67 as photocatalyst for fluorescent dye degradation and selectively nonenzymatic sensing of dopamine**

*Zhichao Wang<sup>1</sup>, Bianying Wen<sup>\*2</sup>, Jie Zhou<sup>3</sup>, Xin Zhao<sup>3</sup>, Xiaoyuan Zhang<sup>\*3</sup>, Zhiqiang Su<sup>\*3</sup>*

1. Precision Forestry Key Laboratory of Beijing, Beijing Forestry University, Beijing 100083, China.
2. Key Laboratory of Processing and Quality Evaluation Technology of Green Plastics of China National Light Industry Council, Beijing Technology and Business University, Beijing 100048, China
3. State Key Laboratory of Chemical Resource Engineering, Beijing Key Laboratory of Advanced Functional Polymer Composites, Beijing University of Chemical Technology, Beijing 100029, China.

\* Corresponding authors. E-mail addresses: weibianying@tsinghua.org.cn (B. Wen), 2020700036@buct.edu.cn (X. Zhang), suzq@mail.buct.edu.cn (Z. Su)

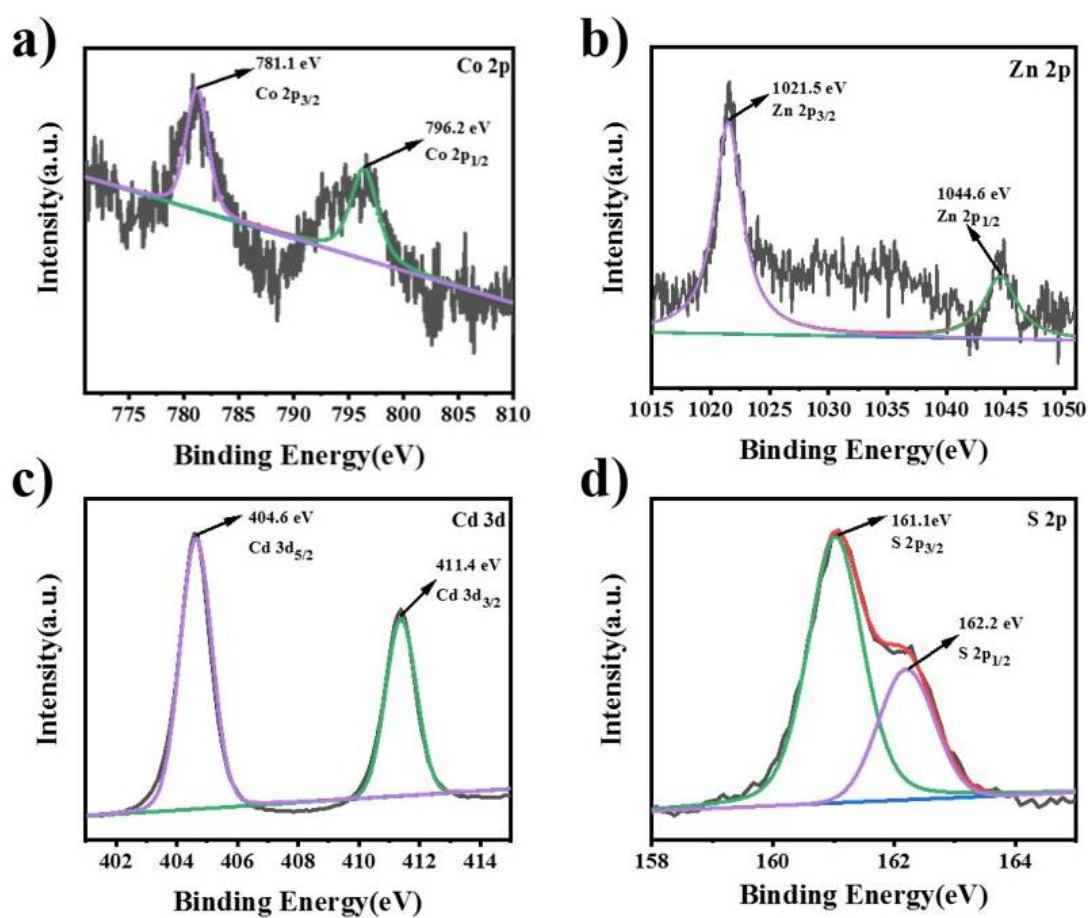

**Figure S1.** High-resolution XPS Co 2p (a)spectrum of  $\text{Zn}_{0.2}\text{Cd}_{0.8}\text{S}@ \text{ZIF-67}$ ; Zn 2p (b); Cd 3d (c); S 2p (d)spectrum of  $\text{Zn}_{0.2}\text{Cd}_{0.8}\text{S}$ .

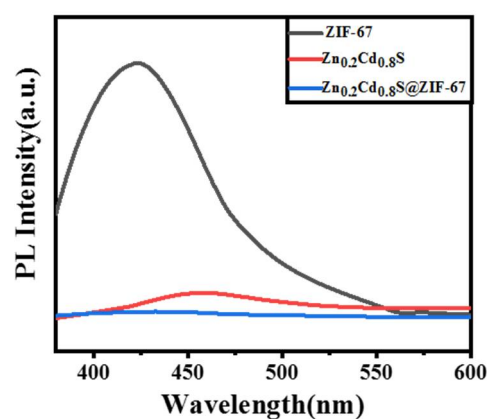

**Figure S2.** Steady-state fluorescence spectra of  $\text{Zn}_{0.2}\text{Cd}_{0.8}\text{S}$ , ZIF-67 and  $\text{Zn}_{0.2}\text{Cd}_{0.8}\text{S}@ \text{ZIF-67}$ .

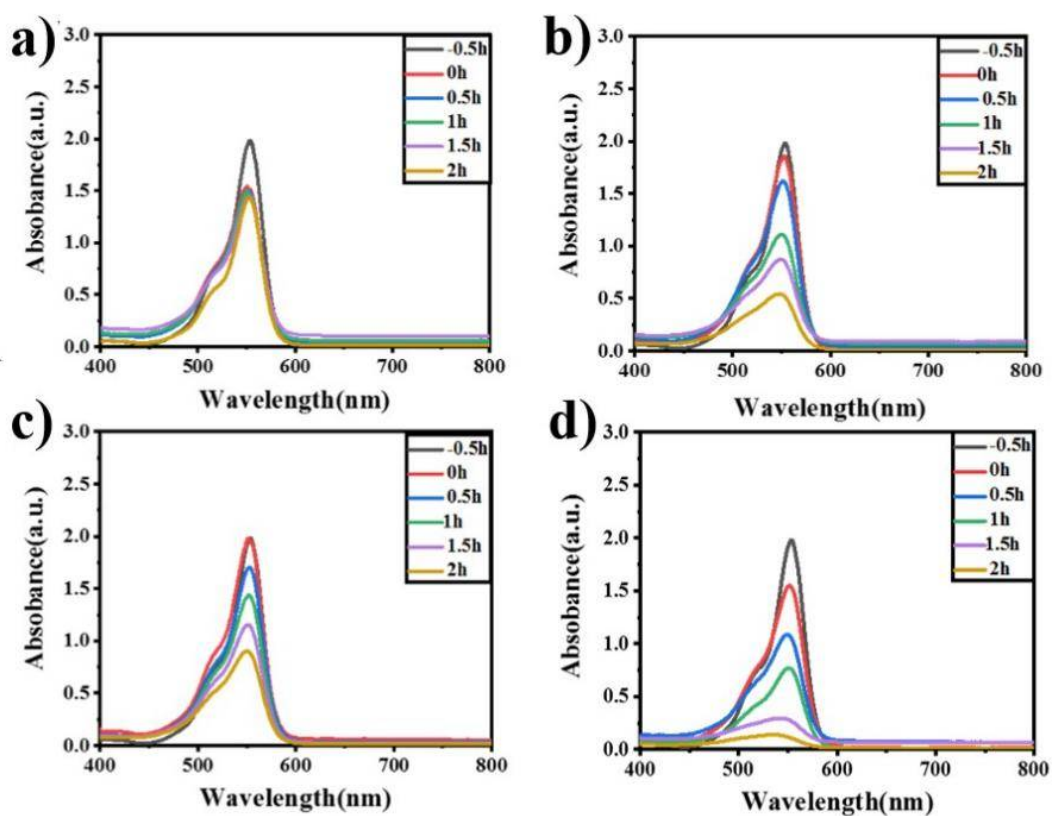

**Figure S3.** UV-Vis spectrogram of RhB degradation by (a)  $\text{Zn}_{0.2}\text{Cd}_{0.8}\text{S}$ , (b) ZIF-67, (c)  $\text{Zn}_{0.2}\text{Cd}_{0.8}\text{S}@ZIF-67$  and (d)  $\text{Zn}_{0.2}\text{Cd}_{0.8}\text{S}@ZIF-67(50 \text{ mg})$ .

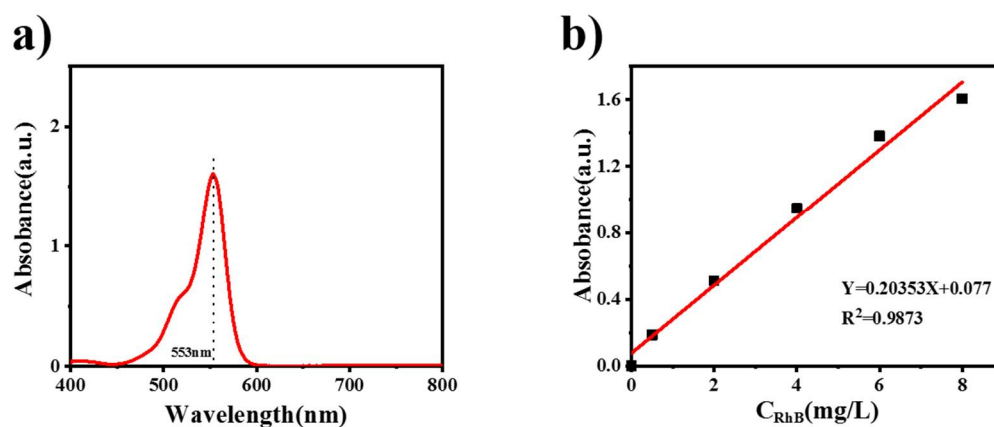

**Figure S4.** (a) The absorbance of RhB; (b) The pseudo-first-order kinetics of RhB used for  $\text{Zn}_{0.2}\text{Cd}_{0.8}\text{S}@ZIF-67$ .

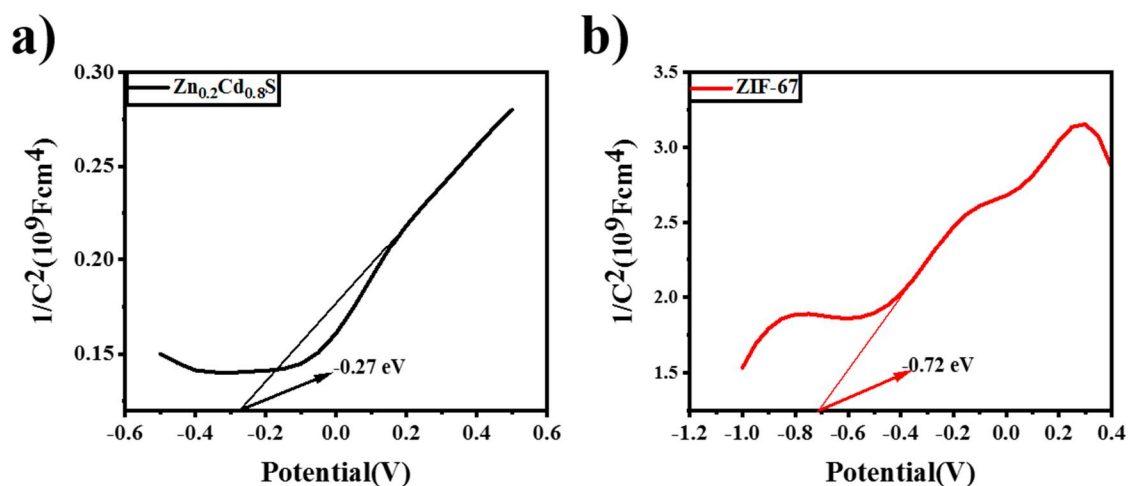

**Figure S5.** Mott-schottky plots of (a)  $\text{Zn}_{0.2}\text{Cd}_{0.8}\text{S}$  and (b) ZIF-67.

**Table S1.** XRD peaks analysis for  $\text{Zn}_{0.2}\text{Cd}_{0.8}\text{S}$  and  $\text{Zn}_{0.2}\text{Cd}_{0.8}\text{S}@ \text{ZIF-67}$ .

| Sample                                                                    | Peak/ $^\circ$ | hkl | crystalline size (Å) | % crystallinity |
|---------------------------------------------------------------------------|----------------|-----|----------------------|-----------------|
| <b><math>\text{Zn}_{0.2}\text{Cd}_{0.8}\text{S}</math></b>                | 24.915         | 100 | 3.5708               | 69.8            |
|                                                                           | 28.124         | 101 | 3.1703               | 100             |
|                                                                           | 51.659         | 200 | 1.7679               | 95.2            |
| <b><math>\text{Zn}_{0.2}\text{Cd}_{0.8}\text{S}@ \text{ZIF-67}</math></b> | 24.847         | 100 | 3.5804               | 78.7            |
|                                                                           | 26.595         | 002 | 3.3489               | 70.6            |
|                                                                           | 28.258         | 101 | 3.1555               | 96.4            |
|                                                                           | 43.669         | 110 | 2.0711               | 93.5            |
|                                                                           | 48.140         | 103 | 1.8886               | 5.8             |
|                                                                           | 51.905         | 200 | 1.7601               | 7.2             |
